# Supplementary material for: JAK1 as a prognostic marker and its correlation with immune infiltrates in breast cancer
Source: Aging (Albany NY). 2019 Dec 2;11(23):11124–35. doi: 10.18632/aging.102514 (PMC6932910; doi:10.18632/aging.102514)
Supplement: Supplementary Table 1 [file aging-11-102514-s001..xlsx]

## Sheet: Sheet1
TYPE	ID_NAME	ID_DESCRIPTION	DATA_POSTPROCESSING	DATASET	CANCER TYPE	SUBTYPE	ENDPOINT	COHORT	CONTRIBUTOR	ARRAY TYPE	PROBE ID	N	CUTPOINT	MINIMUM P-VALUE	CORRECTED P-VALUE	ln(HR-high / HR-low)	COX P-VALUE	ln(HR)	HR [95% CI-low CI-upp]
GENE	JAK1	Janus kinase 1	None	GSE5287	Bladder cancer		Overall Survival	Aarhus (1995-2004)	Als	HG-U133A	201648_at	30	0.4	0.00350719	0.0714167	-1.20249	0.144677	-0.601743	0.55 [0.24 - 1.23]
GENE	JAK1	Janus kinase 1	None	GSE13507	Bladder cancer		Overall Survival	CNUH	Kim	Human-6 v2	ILMN_1793384	165	0.212121	0.0491925	0.486758	-0.518072	0.902964	0.0208517	1.02 [0.73 - 1.43]
GENE	JAK1	Janus kinase 1	None	GSE13507	Bladder cancer	Transitional cell carcinoma	Disease Specific Survival	CNUH	Kim	Human-6 v2	ILMN_1793384	165	0.212121	0.0385372	0.417592	-0.753238	0.757777	-0.0785533	0.92 [0.56 - 1.52]
GENE	JAK1	Janus kinase 1	None	GSE12417-GPL96	Blood cancer	AML	Overall Survival	AMLCG (1999-2003)	Metzeler	HG-U133A	201648_at	163	0.840491	0.0220858	0.287275	-0.744707	0.571231	0.0893123	1.09 [0.80 - 1.49]
GENE	JAK1	Janus kinase 1	None	GSE12417-GPL570	Blood cancer	AML	Overall Survival	AMLCG (2004)	Metzeler	HG-U133_Plus_2	1562103_at	79	0.835443	0.190216	-	0.463811	0.84606	-0.15233	0.86 [0.18 - 4.00]
GENE	JAK1	Janus kinase 1	None	GSE12417-GPL570	Blood cancer	AML	Overall Survival	AMLCG (2004)	Metzeler	HG-U133_Plus_2	201648_at	79	0.594937	0.128872	-	-0.466507	0.949214	-0.0247078	0.98 [0.46 - 2.09]
GENE	JAK1	Janus kinase 1	None	GSE12417-GPL570	Blood cancer	AML	Overall Survival	AMLCG (2004)	Metzeler	HG-U133_Plus_2	1552610_a_at	79	0.78481	0.293976	-	-0.407277	0.936096	0.0259372	1.03 [0.54 - 1.93]
GENE	JAK1	Janus kinase 1	None	GSE12417-GPL570	Blood cancer	AML	Overall Survival	AMLCG (2004)	Metzeler	HG-U133_Plus_2	1552611_a_at	79	0.21519	0.0634298	-	0.791278	0.873351	0.0592338	1.06 [0.51 - 2.20]
GENE	JAK1	Janus kinase 1	None	GSE5122	Blood cancer	AML	Overall Survival	San Diego	Raponi	HG-U133A	201648_at	58	0.87931	0.0285681	0.342802	-1.00278	0.296417	-0.36458	0.69 [0.35 - 1.38]
GENE	JAK1	Janus kinase 1	None	GSE8970	Blood cancer	AML	Overall Survival	San Diego	Raponi	HG-U133A	201648_at	34	0.823529	0.135461	-	-0.810877	0.817001	-0.0695063	0.93 [0.52 - 1.68]
GENE	JAK1	Janus kinase 1	None	GSE4475	Blood cancer	B-cell lymphoma	Overall Survival	Berlin (2003-2005)	Hummel	HG-U133A	201648_at	158	0.892405	0.243461	-	-0.533875	0.803123	-0.0511942	0.95 [0.64 - 1.42]
GENE	JAK1	Janus kinase 1	None	E-TABM-346	Blood cancer	DLBCL	Event Free Survival	GELA (1998-2000)	Jais	HG-U133A	201648_at	53	0.490566	0.126467	-	-0.523892	0.859805	-0.0936942	0.91 [0.32 - 2.58]
GENE	JAK1	Janus kinase 1	None	E-TABM-346	Blood cancer	DLBCL	Overall Survival	GELA (1998-2000)	Jais	HG-U133A	201648_at	53	0.490566	0.184577	-	-0.485313	0.836966	-0.118109	0.89 [0.29 - 2.74]
GENE	JAK1	Janus kinase 1	None	GSE16131-GPL96	Blood cancer	Follicular lymphoma	Overall Survival	NCI (1974-2001)	Dave	HG-U133A	201648_at	180	0.527778	0.408238	-	-0.175128	0.536108	-0.290267	0.75 [0.30 - 1.88]
GENE	JAK1	Janus kinase 1	None	GSE2658	Blood cancer	Multiple myeloma	Disease Specific Survival	Arkansas	Zhan	HG-U133_Plus_2	1562103_at	559	0.135957	0.0297885	0.352586	1.06057	0.469234	0.131043	1.14 [0.80 - 1.63]
GENE	JAK1	Janus kinase 1	None	GSE2658	Blood cancer	Multiple myeloma	Disease Specific Survival	Arkansas	Zhan	HG-U133_Plus_2	201648_at	559	0.697674	0.0139807	0.207089	-0.617122	0.0811051	-0.385859	0.68 [0.44 - 1.05]
GENE	JAK1	Janus kinase 1	None	GSE2658	Blood cancer	Multiple myeloma	Disease Specific Survival	Arkansas	Zhan	HG-U133_Plus_2	1552610_a_at	559	0.762075	0.0179619	0.248251	-0.713204	0.913155	0.0167614	1.02 [0.75 - 1.37]
GENE	JAK1	Janus kinase 1	None	GSE2658	Blood cancer	Multiple myeloma	Disease Specific Survival	Arkansas	Zhan	HG-U133_Plus_2	1552611_a_at	559	0.384615	0.0933186	-	0.350835	0.872475	0.0358067	1.04 [0.67 - 1.60]
GENE	JAK1	Janus kinase 1	None	GSE4271-GPL96	Brain cancer	Astrocytoma	Overall Survival	MDA	Phillips	HG-U133A	201648_at	77	0.623377	0.00483991	0.0922483	-0.752614	0.0524048	-0.747325	0.47 [0.22 - 1.01]
GENE	JAK1	Janus kinase 1	None	GSE7696	Brain cancer	Glioblastoma	Overall Survival	Lausanne	Murat	HG-U133_Plus_2	1562103_at	70	0.585714	0.0228974	0.294587	-0.615553	0.232061	-1.2102	0.30 [0.04 - 2.17]
GENE	JAK1	Janus kinase 1	None	GSE7696	Brain cancer	Glioblastoma	Overall Survival	Lausanne	Murat	HG-U133_Plus_2	201648_at	70	0.885714	0.198591	-	-0.596717	0.547202	-0.211383	0.81 [0.41 - 1.61]
GENE	JAK1	Janus kinase 1	None	GSE7696	Brain cancer	Glioblastoma	Overall Survival	Lausanne	Murat	HG-U133_Plus_2	1552610_a_at	70	0.542857	0.0500294	-	0.523234	0.878882	0.0447361	1.05 [0.59 - 1.86]
GENE	JAK1	Janus kinase 1	None	GSE7696	Brain cancer	Glioblastoma	Overall Survival	Lausanne	Murat	HG-U133_Plus_2	1552611_a_at	70	0.685714	0.275454	-	0.307445	0.969211	0.0138344	1.01 [0.50 - 2.05]
GENE	JAK1	Janus kinase 1	None	MGH-glioma	Brain cancer	Glioma	Overall Survival	CBTTB, MGH, BWH, CH	Nutt	HG-U95A	34877_at	50	0.32	0.0357971	0.398129	0.821184	0.826183	-0.053336	0.95 [0.59 - 1.53]
GENE	JAK1	Janus kinase 1	None	MGH-glioma	Brain cancer	Glioma	Overall Survival	CBTTB, MGH, BWH, CH	Nutt	HG-U95A	1457_at	50	0.28	0.109354	-	-0.616189	0.394481	-0.227741	0.80 [0.47 - 1.35]
GENE	JAK1	Janus kinase 1	None	MGH-glioma	Brain cancer	Glioma	Overall Survival	CBTTB, MGH, BWH, CH	Nutt	HG-U95A	41594_at	50	0.56	0.0905145	-	-0.609128	0.338183	-0.325133	0.72 [0.37 - 1.41]
GENE	JAK1	Janus kinase 1	None	GSE4412-GPL96	Brain cancer	Glioma	Overall Survival	UCLA (1996-2003)	Freije	HG-U133A	201648_at	74	0.810811	8.92276e-05	0.00316746	-2.02398	0.000896111	-1.55646	0.21 [0.08 - 0.53]
GENE	JAK1	Janus kinase 1	None	GSE16581	Brain cancer	Meningioma	Overall Survival	UCLA	Lee	HG-U133_Plus_2	201648_at	67	0.164179	0.00996692	0.161058	-1.58051	0.388312	-0.716722	0.49 [0.10 - 2.49]
GENE	JAK1	Janus kinase 1	None	GSE16581	Brain cancer	Meningioma	Overall Survival	UCLA	Lee	HG-U133_Plus_2	1552610_a_at	67	0.895522	0.0107334	0.170272	1.63022	0.479782	-0.490838	0.61 [0.16 - 2.39]
GENE	JAK1	Janus kinase 1	None	GSE16581	Brain cancer	Meningioma	Overall Survival	UCLA	Lee	HG-U133_Plus_2	1552611_a_at	67	0.477612	0.0282948	0.340585	-1.59704	0.667279	-0.408864	0.66 [0.10 - 4.29]
GENE	JAK1	Janus kinase 1	None	GSE16581	Brain cancer	Meningioma	Overall Survival	UCLA	Lee	HG-U133_Plus_2	1562103_at	67	0.80597	0.0886573	-	-15.4668	0.381419	-1.23721	0.29 [0.02 - 4.63]
GENE	JAK1	Janus kinase 1	None	GSE19615	Breast cancer		Distant Metastasis Free Survival	DF/HCC	Li	HG-U133_Plus_2	201648_at	115	0.469565	0.0502815	-	-1.10422	0.69853	-0.309048	0.73 [0.15 - 3.51]
GENE	JAK1	Janus kinase 1	None	GSE19615	Breast cancer		Distant Metastasis Free Survival	DF/HCC	Li	HG-U133_Plus_2	1552610_a_at	115	0.408696	0.0310255	0.362309	1.49771	0.147924	0.854495	2.35 [0.74 - 7.48]
GENE	JAK1	Janus kinase 1	None	GSE19615	Breast cancer		Distant Metastasis Free Survival	DF/HCC	Li	HG-U133_Plus_2	1552611_a_at	115	0.495652	0.0251281	0.314128	1.34966	0.227108	0.675426	1.96 [0.66 - 5.88]
GENE	JAK1	Janus kinase 1	None	GSE19615	Breast cancer		Distant Metastasis Free Survival	DF/HCC	Li	HG-U133_Plus_2	1562103_at	115	0.86087	0.078105	-	1.00245	0.709508	-0.414006	0.66 [0.07 - 5.84]
GENE	JAK1	Janus kinase 1	None	GSE3143	Breast cancer		Overall Survival	Duke	Bild	HG-U95A	1457_at	158	0.132911	0.16842	-	0.704422	0.990365	-0.00207198	1.00 [0.71 - 1.40]
GENE	JAK1	Janus kinase 1	None	GSE3143	Breast cancer		Overall Survival	Duke	Bild	HG-U95A	41594_at	158	0.341772	0.118174	-	-0.445474	0.658097	-0.147642	0.86 [0.45 - 1.66]
GENE	JAK1	Janus kinase 1	None	GSE3143	Breast cancer		Overall Survival	Duke	Bild	HG-U95A	34877_at	158	0.841772	0.187611	-	-0.612561	0.557517	-0.255248	0.77 [0.33 - 1.82]
GENE	JAK1	Janus kinase 1	None	GSE7849	Breast cancer		Disease Free Survival	Duke (1990-2001)	Anders	HG-U95A	1457_at	76	0.263158	0.0752108	-	1.64941	0.421182	0.547303	1.73 [0.46 - 6.56]
GENE	JAK1	Janus kinase 1	None	GSE7849	Breast cancer		Disease Free Survival	Duke (1990-2001)	Anders	HG-U95A	41594_at	76	0.578947	0.155268	-	0.733243	0.987199	0.0133064	1.01 [0.20 - 5.15]
GENE	JAK1	Janus kinase 1	None	GSE7849	Breast cancer		Disease Free Survival	Duke (1990-2001)	Anders	HG-U95A	34877_at	76	0.118421	0.0213971	0.28098	-1.27052	0.166542	-0.790137	0.45 [0.15 - 1.39]
GENE	JAK1	Janus kinase 1	None	GSE12276	Breast cancer		Relapse Free Survival	EMC	Bos	HG-U133_Plus_2	1552611_a_at	204	0.397059	0.0193817	0.26206	-0.336732	0.100349	-0.291478	0.75 [0.53 - 1.06]
GENE	JAK1	Janus kinase 1	None	GSE12276	Breast cancer		Relapse Free Survival	EMC	Bos	HG-U133_Plus_2	1562103_at	204	0.495098	0.00285735	0.0605607	-0.430701	0.470389	-0.0717033	0.93 [0.77 - 1.13]
GENE	JAK1	Janus kinase 1	None	GSE12276	Breast cancer		Relapse Free Survival	EMC	Bos	HG-U133_Plus_2	201648_at	204	0.848039	0.0538321	-	-0.381412	0.331048	-0.175574	0.84 [0.59 - 1.20]
GENE	JAK1	Janus kinase 1	None	GSE12276	Breast cancer		Relapse Free Survival	EMC	Bos	HG-U133_Plus_2	1552610_a_at	204	0.5	0.148024	-	-0.202703	0.297079	-0.101655	0.90 [0.75 - 1.09]
GENE	JAK1	Janus kinase 1	None	GSE6532-GPL570	Breast cancer		Distant Metastasis Free Survival	GUYT	Loi	HG-U133_Plus_2	201648_at	87	0.689655	0.00836273	0.141003	-1.4754	0.00994975	-1.12962	0.32 [0.14 - 0.76]
GENE	JAK1	Janus kinase 1	None	GSE6532-GPL570	Breast cancer		Relapse Free Survival	GUYT	Loi	HG-U133_Plus_2	1552610_a_at	87	0.126437	0.00639376	0.114692	-1.21279	0.15958	-0.378846	0.68 [0.40 - 1.16]
GENE	JAK1	Janus kinase 1	None	GSE6532-GPL570	Breast cancer		Distant Metastasis Free Survival	GUYT	Loi	HG-U133_Plus_2	1552610_a_at	87	0.126437	0.00639376	0.114692	-1.21279	0.15958	-0.378846	0.68 [0.40 - 1.16]
GENE	JAK1	Janus kinase 1	None	GSE6532-GPL570	Breast cancer		Relapse Free Survival	GUYT	Loi	HG-U133_Plus_2	1552611_a_at	87	0.597701	0.229708	-	-0.498839	0.604841	-0.189967	0.83 [0.40 - 1.70]
GENE	JAK1	Janus kinase 1	None	GSE6532-GPL570	Breast cancer		Distant Metastasis Free Survival	GUYT	Loi	HG-U133_Plus_2	1552611_a_at	87	0.597701	0.229708	-	-0.498839	0.604841	-0.189967	0.83 [0.40 - 1.70]
GENE	JAK1	Janus kinase 1	None	GSE6532-GPL570	Breast cancer		Relapse Free Survival	GUYT	Loi	HG-U133_Plus_2	1562103_at	87	0.137931	0.0596574	-	1.70577	0.619097	0.405386	1.50 [0.30 - 7.42]
GENE	JAK1	Janus kinase 1	None	GSE6532-GPL570	Breast cancer		Distant Metastasis Free Survival	GUYT	Loi	HG-U133_Plus_2	1562103_at	87	0.137931	0.0596574	-	1.70577	0.619097	0.405386	1.50 [0.30 - 7.42]
GENE	JAK1	Janus kinase 1	None	GSE6532-GPL570	Breast cancer		Relapse Free Survival	GUYT	Loi	HG-U133_Plus_2	201648_at	87	0.689655	0.00836273	0.141003	-1.4754	0.00994975	-1.12962	0.32 [0.14 - 0.76]
GENE	JAK1	Janus kinase 1	None	GSE9195	Breast cancer		Distant Metastasis Free Survival	GUYT2	Loi	HG-U133_Plus_2	201648_at	77	0.103896	0.0196895	0.264999	-1.47946	0.0298085	-1.45055	0.23 [0.06 - 0.87]
GENE	JAK1	Janus kinase 1	None	GSE9195	Breast cancer		Relapse Free Survival	GUYT2	Loi	HG-U133_Plus_2	201648_at	77	0.103896	0.000126047	0.00429291	-1.9106	0.00153696	-1.99732	0.14 [0.04 - 0.47]
GENE	JAK1	Janus kinase 1	None	GSE9195	Breast cancer		Relapse Free Survival	GUYT2	Loi	HG-U133_Plus_2	1562103_at	77	0.181818	0.184568	-	-0.778175	0.856898	-0.238195	0.79 [0.06 - 10.49]
GENE	JAK1	Janus kinase 1	None	GSE9195	Breast cancer		Distant Metastasis Free Survival	GUYT2	Loi	HG-U133_Plus_2	1552611_a_at	77	0.376623	0.206452	-	0.962201	0.716003	0.194174	1.21 [0.43 - 3.46]
GENE	JAK1	Janus kinase 1	None	GSE9195	Breast cancer		Distant Metastasis Free Survival	GUYT2	Loi	HG-U133_Plus_2	1552610_a_at	77	0.38961	0.0275124	0.33418	-1.40411	0.249076	-0.427052	0.65 [0.32 - 1.35]
GENE	JAK1	Janus kinase 1	None	GSE9195	Breast cancer		Relapse Free Survival	GUYT2	Loi	HG-U133_Plus_2	1552611_a_at	77	0.545455	0.259377	-	-0.66591	0.798801	-0.127523	0.88 [0.33 - 2.35]
GENE	JAK1	Janus kinase 1	None	GSE9195	Breast cancer		Relapse Free Survival	GUYT2	Loi	HG-U133_Plus_2	1552610_a_at	77	0.584416	0.00731681	0.127287	-2.27226	0.0544742	-0.659129	0.52 [0.26 - 1.01]
GENE	JAK1	Janus kinase 1	None	GSE9195	Breast cancer		Distant Metastasis Free Survival	GUYT2	Loi	HG-U133_Plus_2	1562103_at	77	0.701299	0.0331412	0.37851	-15.615	0.247359	-1.70302	0.18 [0.01 - 3.26]
GENE	JAK1	Janus kinase 1	None	GSE12093	Breast cancer		Distant Metastasis Free Survival	IO, NCI, TUM, CCF (1992-2000)	Zhang	HG-U133A	201648_at	136	0.227941	0.000758703	0.0201973	-1.43922	0.00834641	-1.32906	0.26 [0.10 - 0.71]
GENE	JAK1	Janus kinase 1	None	GSE11121	Breast cancer		Distant Metastasis Free Survival	Mainz (1988-1998)	Schmidt	HG-U133A	201648_at	200	0.105	3.10815e-06	0.0001542	-1.44394	7.21134e-05	-1.88215	0.15 [0.06 - 0.39]
GENE	JAK1	Janus kinase 1	None	GSE1378	Breast cancer		Relapse Free Survival	MGH (1987-2000)	Ma	Arcturus 22k	17797	60	0.316667	0.000421132	0.0122338	-1.26642	0.0573638	-0.505889	0.60 [0.36 - 1.02]
GENE	JAK1	Janus kinase 1	None	GSE1379	Breast cancer		Relapse Free Survival	MGH (1987-2000)	Ma	Arcturus 22k	17797	60	0.183333	0.358495	-	-0.424056	0.935212	-0.0591593	0.94 [0.23 - 3.92]
GENE	JAK1	Janus kinase 1	None	GSE9893	Breast cancer		Overall Survival	Montpellier, Bordeaux, Turin (1989-2001)	Chanrion	MLRG Human 21K V12.0	13411	155	0.380645	8.41731e-07	4.64171e-05	-1.34982	2.38332e-05	-0.85606	0.42 [0.29 - 0.63]
GENE	JAK1	Janus kinase 1	None	GSE2034	Breast cancer		Distant Metastasis Free Survival	Rotterdam (1980-1995)	Wang	HG-U133A	201648_at	286	0.454545	0.0189636	0.258037	-0.452881	0.243634	-0.354353	0.70 [0.39 - 1.27]
GENE	JAK1	Janus kinase 1	None	GSE1456-GPL96	Breast cancer		Relapse Free Survival	Stockholm (1994-1996)	Pawitan	HG-U133A	201648_at	159	0.125786	1.82955e-07	1.12758e-05	-1.57388	0.000196418	-1.8311	0.16 [0.06 - 0.42]
GENE	JAK1	Janus kinase 1	None	GSE1456-GPL96	Breast cancer		Disease Specific Survival	Stockholm (1994-1996)	Pawitan	HG-U133A	201648_at	159	0.138365	3.25437e-07	1.92597e-05	-1.71397	0.000386357	-2.05196	0.13 [0.04 - 0.40]
GENE	JAK1	Janus kinase 1	None	GSE1456-GPL96	Breast cancer		Overall Survival	Stockholm (1994-1996)	Pawitan	HG-U133A	201648_at	159	0.144654	3.45e-06	0.000169638	-1.42147	0.00026008	-1.8023	0.16 [0.06 - 0.43]
GENE	JAK1	Janus kinase 1	None	GSE7378	Breast cancer		Disease Free Survival	UCSF	Zhou	U133AAofAv2	201648_at	54	0.740741	0.052089	-	1.26945	0.357487	0.550311	1.73 [0.54 - 5.60]
GENE	JAK1	Janus kinase 1	None	E-TABM-158	Breast cancer		Relapse Free Survival	UCSF, CPMC (1989-1997)	Chin	HG-U133A	201648_at	117	0.897436	0.0338796	0.384043	-1.88094	0.572342	0.164483	1.18 [0.67 - 2.09]
GENE	JAK1	Janus kinase 1	None	E-TABM-158	Breast cancer		Disease Specific Survival	UCSF, CPMC (1989-1997)	Chin	HG-U133A	201648_at	117	0.521368	0.0616618	-	0.721764	0.3491	0.343047	1.41 [0.69 - 2.89]
GENE	JAK1	Janus kinase 1	None	E-TABM-158	Breast cancer		Distant Metastasis Free Survival	UCSF, CPMC (1989-1997)	Chin	HG-U133A	201648_at	117	0.128205	0.114539	-	1.47283	0.535806	0.232363	1.26 [0.60 - 2.63]
GENE	JAK1	Janus kinase 1	None	E-TABM-158	Breast cancer		Overall Survival	UCSF, CPMC (1989-1997)	Chin	HG-U133A	201648_at	117	0.897436	0.0338796	0.384043	-1.88094	0.572342	0.164483	1.18 [0.67 - 2.09]
GENE	JAK1	Janus kinase 1	None	GSE3494-GPL96	Breast cancer		Disease Specific Survival	Uppsala (1987-1989)	Miller	HG-U133A	201648_at	236	0.211864	0.019574	0.263899	-0.669629	0.0294883	-0.992049	0.37 [0.15 - 0.91]
GENE	JAK1	Janus kinase 1	None	GSE4922-GPL96	Breast cancer		Disease Free Survival	Uppsala (1987-1989)	Ivshina	HG-U133A	201648_at	249	0.212851	0.0868713	-	-0.411833	0.163968	-0.504595	0.60 [0.30 - 1.23]
GENE	JAK1	Janus kinase 1	None	GSE2990	Breast cancer		Relapse Free Survival	Uppsala, Oxford	Sotiriou	HG-U133A	201648_at	62	0.193548	0.00145591	0.0348617	-1.52876	0.0824542	-0.691448	0.50 [0.23 - 1.09]
GENE	JAK1	Janus kinase 1	None	GSE2990	Breast cancer		Distant Metastasis Free Survival	Uppsala, Oxford	Sotiriou	HG-U133A	201648_at	125	0.168	0.00837394	0.141147	-1.02324	0.102514	-0.720886	0.49 [0.20 - 1.16]
GENE	JAK1	Janus kinase 1	None	GSE2990	Breast cancer		Relapse Free Survival	Uppsala, Oxford	Sotiriou	HG-U133A	201648_at	125	0.296	0.127907	-	-0.444649	0.385171	-0.296001	0.74 [0.38 - 1.45]
GENE	JAK1	Janus kinase 1	None	GSE2990	Breast cancer		Distant Metastasis Free Survival	Uppsala, Oxford	Sotiriou	HG-U133A	201648_at	54	0.37037	0.000532581	0.0149547	-2.30082	0.0682753	-0.94372	0.39 [0.14 - 1.07]
GENE	JAK1	Janus kinase 1	None	GSE7390	Breast cancer		Distant Metastasis Free Survival	Uppsala, Oxford, Stockholm, IGR, GUYT, CRH (1980-1998)	Desmedt	HG-U133A	201648_at	198	0.838384	0.00110931	0.0277986	-1.99773	0.0381827	-0.565258	0.57 [0.33 - 0.97]
GENE	JAK1	Janus kinase 1	None	GSE7390	Breast cancer		Overall Survival	Uppsala, Oxford, Stockholm, IGR, GUYT, CRH (1980-1998)	Desmedt	HG-U133A	201648_at	198	0.838384	0.000871254	0.0226976	-2.58196	0.0381021	-0.585365	0.56 [0.32 - 0.97]
GENE	JAK1	Janus kinase 1	None	GSE7390	Breast cancer		Relapse Free Survival	Uppsala, Oxford, Stockholm, IGR, GUYT, CRH (1980-1998)	Desmedt	HG-U133A	201648_at	198	0.838384	0.00533333	0.0995641	-0.994522	0.150523	-0.335991	0.71 [0.45 - 1.13]
GENE	JAK1	Janus kinase 1	None	GSE12945	Colorectal cancer		Disease Free Survival	Berlin	Staub	HG-U133A	201648_at	51	0.470588	0.106111	-	-1.62437	0.232602	-0.918265	0.40 [0.09 - 1.80]
GENE	JAK1	Janus kinase 1	None	GSE12945	Colorectal cancer		Overall Survival	Berlin	Staub	HG-U133A	201648_at	62	0.580645	0.203311	-	-0.824778	0.38453	-0.443999	0.64 [0.24 - 1.75]
GENE	JAK1	Janus kinase 1	None	GSE17536	Colorectal cancer		Disease Specific Survival	MCC	Smith	HG-U133_Plus_2	201648_at	177	0.830508	0.150407	-	0.444965	0.584114	0.284634	1.33 [0.48 - 3.68]
GENE	JAK1	Janus kinase 1	None	GSE17536	Colorectal cancer		Overall Survival	MCC	Smith	HG-U133_Plus_2	1552610_a_at	177	0.38983	0.295642	-	0.25749	0.618851	0.119381	1.13 [0.70 - 1.80]
GENE	JAK1	Janus kinase 1	None	GSE17536	Colorectal cancer		Disease Specific Survival	MCC	Smith	HG-U133_Plus_2	1552610_a_at	177	0.163842	0.280843	-	0.462779	0.417599	0.230461	1.26 [0.72 - 2.20]
GENE	JAK1	Janus kinase 1	None	GSE17536	Colorectal cancer		Overall Survival	MCC	Smith	HG-U133_Plus_2	1552611_a_at	177	0.124294	0.192475	-	0.595839	0.7465	-0.0961175	0.91 [0.51 - 1.63]
GENE	JAK1	Janus kinase 1	None	GSE17536	Colorectal cancer		Disease Specific Survival	MCC	Smith	HG-U133_Plus_2	1552611_a_at	177	0.124294	0.285017	-	0.548964	0.835886	0.0710279	1.07 [0.55 - 2.10]
GENE	JAK1	Janus kinase 1	None	GSE17536	Colorectal cancer		Overall Survival	MCC	Smith	HG-U133_Plus_2	1562103_at	177	0.220339	0.0206063	0.273647	-0.584708	0.333619	-0.71669	0.49 [0.11 - 2.09]
GENE	JAK1	Janus kinase 1	None	GSE17536	Colorectal cancer		Disease Free Survival	MCC	Smith	HG-U133_Plus_2	1552610_a_at	145	0.17931	0.11199	-	0.925504	0.20165	0.472788	1.60 [0.78 - 3.32]
GENE	JAK1	Janus kinase 1	None	GSE17536	Colorectal cancer		Disease Specific Survival	MCC	Smith	HG-U133_Plus_2	1562103_at	177	0.711864	0.213907	-	-0.417777	0.881502	-0.128053	0.88 [0.16 - 4.74]
GENE	JAK1	Janus kinase 1	None	GSE17536	Colorectal cancer		Overall Survival	MCC	Smith	HG-U133_Plus_2	201648_at	177	0.135593	0.202764	-	0.536724	0.584861	0.248016	1.28 [0.53 - 3.12]
GENE	JAK1	Janus kinase 1	None	GSE17536	Colorectal cancer		Disease Free Survival	MCC	Smith	HG-U133_Plus_2	1552611_a_at	145	0.896552	0.102817	-	0.716337	0.752041	0.136987	1.15 [0.49 - 2.68]
GENE	JAK1	Janus kinase 1	None	GSE17536	Colorectal cancer		Disease Free Survival	MCC	Smith	HG-U133_Plus_2	1562103_at	145	0.151724	0.0795474	-	1.20266	0.89163	0.145156	1.16 [0.14 - 9.33]
GENE	JAK1	Janus kinase 1	None	GSE17536	Colorectal cancer		Disease Free Survival	MCC	Smith	HG-U133_Plus_2	201648_at	145	0.827586	0.0416356	0.438721	0.722953	0.18121	0.902003	2.46 [0.66 - 9.25]
GENE	JAK1	Janus kinase 1	None	GSE14333	Colorectal cancer		Disease Free Survival	Melbourne	Jorissen	HG-U133_Plus_2	1552610_a_at	226	0.367257	0.0780421	-	0.577002	0.386045	0.213664	1.24 [0.76 - 2.01]
GENE	JAK1	Janus kinase 1	None	GSE14333	Colorectal cancer		Disease Free Survival	Melbourne	Jorissen	HG-U133_Plus_2	1552611_a_at	226	0.185841	0.0893015	-	-0.543091	0.355449	-0.318175	0.73 [0.37 - 1.43]
GENE	JAK1	Janus kinase 1	None	GSE14333	Colorectal cancer		Disease Free Survival	Melbourne	Jorissen	HG-U133_Plus_2	1562103_at	226	0.676991	0.0376704	0.411517	0.590822	0.422309	0.284064	1.33 [0.66 - 2.66]
GENE	JAK1	Janus kinase 1	None	GSE14333	Colorectal cancer		Disease Free Survival	Melbourne	Jorissen	HG-U133_Plus_2	201648_at	226	0.110619	0.0312393	0.363971	1.8858	0.771217	0.101785	1.11 [0.56 - 2.20]
GENE	JAK1	Janus kinase 1	None	GSE17537	Colorectal cancer		Overall Survival	VMC	Smith	HG-U133_Plus_2	1552610_a_at	55	0.654545	0.00802233	0.136599	1.13603	0.15	0.708066	2.03 [0.77 - 5.32]
GENE	JAK1	Janus kinase 1	None	GSE17537	Colorectal cancer		Overall Survival	VMC	Smith	HG-U133_Plus_2	1552611_a_at	55	0.309091	0.0122427	0.1878	-1.0761	0.368427	-0.430685	0.65 [0.25 - 1.66]
GENE	JAK1	Janus kinase 1	None	GSE17537	Colorectal cancer		Overall Survival	VMC	Smith	HG-U133_Plus_2	1562103_at	55	0.363636	0.0229483	0.295041	-0.983753	0.172064	-1.71001	0.18 [0.02 - 2.10]
GENE	JAK1	Janus kinase 1	None	GSE17537	Colorectal cancer		Overall Survival	VMC	Smith	HG-U133_Plus_2	201648_at	55	0.309091	0.0703321	-	1.08093	0.296326	0.649823	1.92 [0.57 - 6.48]
GENE	JAK1	Janus kinase 1	None	GSE17537	Colorectal cancer		Disease Free Survival	VMC	Smith	HG-U133_Plus_2	1552610_a_at	55	0.890909	0.233101	-	0.816698	0.647727	0.210381	1.23 [0.50 - 3.04]
GENE	JAK1	Janus kinase 1	None	GSE17537	Colorectal cancer		Disease Free Survival	VMC	Smith	HG-U133_Plus_2	201648_at	55	0.163636	0.373653	-	-0.452242	0.648063	0.317902	1.37 [0.35 - 5.38]
GENE	JAK1	Janus kinase 1	None	GSE17537	Colorectal cancer		Disease Specific Survival	VMC	Smith	HG-U133_Plus_2	201648_at	49	0.755102	0.208771	-	0.721476	0.682153	0.313001	1.37 [0.31 - 6.12]
GENE	JAK1	Janus kinase 1	None	GSE17537	Colorectal cancer		Disease Specific Survival	VMC	Smith	HG-U133_Plus_2	1552610_a_at	49	0.142857	0.125421	-	-0.985573	0.944036	-0.0377504	0.96 [0.34 - 2.76]
GENE	JAK1	Janus kinase 1	None	GSE17537	Colorectal cancer		Disease Free Survival	VMC	Smith	HG-U133_Plus_2	1552611_a_at	55	0.527273	0.0026481	0.0569445	-1.70431	0.0272353	-1.07811	0.34 [0.13 - 0.89]
GENE	JAK1	Janus kinase 1	None	GSE17537	Colorectal cancer		Disease Free Survival	VMC	Smith	HG-U133_Plus_2	1562103_at	55	0.145455	0.144798	-	-0.775856	0.405014	-1.12888	0.32 [0.02 - 4.61]
GENE	JAK1	Janus kinase 1	None	GSE17537	Colorectal cancer		Disease Specific Survival	VMC	Smith	HG-U133_Plus_2	1552611_a_at	49	0.306122	0.0011022	0.0276495	-1.82394	0.0906359	-0.95942	0.38 [0.13 - 1.16]
GENE	JAK1	Janus kinase 1	None	GSE17537	Colorectal cancer		Disease Specific Survival	VMC	Smith	HG-U133_Plus_2	1562103_at	49	0.346939	0.0764434	-	-0.996463	0.15524	-2.25614	0.10 [0.00 - 2.35]
GENE	JAK1	Janus kinase 1	None	GSE11595	Esophagus cancer	Adenocarcinoma	Overall Survival	Sutton	Giddings	CRUKDMF_22K_v1.0.0	713193	34	0.823529	0.104999	-	-1.15243	0.144349	-0.889788	0.41 [0.12 - 1.36]
GENE	JAK1	Janus kinase 1	None	GSE22138	Eye cancer	Uveal melanoma	Distant Metastasis Free Survival	BRCIC	Laurent	HG-U133_Plus_2	1552610_a_at	63	0.571429	0.0528983	-	-0.697003	0.673345	-0.0847402	0.92 [0.62 - 1.36]
GENE	JAK1	Janus kinase 1	None	GSE22138	Eye cancer	Uveal melanoma	Distant Metastasis Free Survival	BRCIC	Laurent	HG-U133_Plus_2	1552611_a_at	63	0.857143	0.026843	0.328632	0.923528	0.369922	0.212578	1.24 [0.78 - 1.97]
GENE	JAK1	Janus kinase 1	None	GSE22138	Eye cancer	Uveal melanoma	Distant Metastasis Free Survival	BRCIC	Laurent	HG-U133_Plus_2	1562103_at	63	0.142857	0.000141656	0.00475564	-1.43047	0.383329	-2.47092	0.08 [0.00 - 21.85]
GENE	JAK1	Janus kinase 1	None	GSE22138	Eye cancer	Uveal melanoma	Distant Metastasis Free Survival	BRCIC	Laurent	HG-U133_Plus_2	201648_at	63	0.111111	0.108172	-	1.11404	0.913066	0.0224558	1.02 [0.68 - 1.53]
GENE	JAK1	Janus kinase 1	None	GSE2837	Head and neck cancer	Squamous cell carcinoma	Relapse Free Survival	VUMC, VAMC, UTMDACC (1992-2005)	Chung	U133_X3P	Hs2.398570.1.S1_3p_at	28	0.607143	0.0180059	0.248685	-1.50205	0.141685	-4.72935	0.01 [0.00 - 4.85]
GENE	JAK1	Janus kinase 1	None	GSE2837	Head and neck cancer	Squamous cell carcinoma	Relapse Free Survival	VUMC, VAMC, UTMDACC (1992-2005)	Chung	U133_X3P	Hs2.50651.1.S1_3p_s_at	28	0.357143	0.0420131	0.441235	-1.11703	0.200313	-1.70648	0.18 [0.01 - 2.47]
GENE	JAK1	Janus kinase 1	None	GSE2837	Head and neck cancer	Squamous cell carcinoma	Relapse Free Survival	VUMC, VAMC, UTMDACC (1992-2005)	Chung	U133_X3P	Hs.50651.0.S2_3p_at	28	0.892857	0.217563	-	0.925143	0.76925	-0.0522778	0.95 [0.67 - 1.35]
GENE	JAK1	Janus kinase 1	None	GSE2837	Head and neck cancer	Squamous cell carcinoma	Relapse Free Survival	VUMC, VAMC, UTMDACC (1992-2005)	Chung	U133_X3P	Hs2.50651.1.S2_3p_s_at	28	0.785714	0.163333	-	-1.04107	0.348857	-4.03594	0.02 [0.00 - 82.11]
GENE	JAK1	Janus kinase 1	None	jacob-00182-CANDF	Lung cancer	Adenocarcinoma	Overall Survival	CAN/DF	Shedden	HG-U133A	201648_at	82	0.341463	0.000675451	0.0183044	-1.10833	0.00246038	-1.37321	0.25 [0.10 - 0.62]
GENE	JAK1	Janus kinase 1	None	HARVARD-LC	Lung cancer	Adenocarcinoma	Overall Survival	Harvard	Beer	HG-U95A	1457_at	84	0.5	0.255339	-	-0.330182	0.525736	-0.243245	0.78 [0.37 - 1.66]
GENE	JAK1	Janus kinase 1	None	HARVARD-LC	Lung cancer	Adenocarcinoma	Overall Survival	Harvard	Beer	HG-U95A	41594_at	84	0.392857	0.216854	-	-0.356797	0.584436	-0.27366	0.76 [0.29 - 2.03]
GENE	JAK1	Janus kinase 1	None	HARVARD-LC	Lung cancer	Adenocarcinoma	Overall Survival	Harvard	Beer	HG-U95A	34877_at	84	0.702381	0.180736	-	-0.435488	0.7368	-0.161782	0.85 [0.33 - 2.19]
GENE	JAK1	Janus kinase 1	None	jacob-00182-HLM	Lung cancer	Adenocarcinoma	Overall Survival	HLM	Shedden	HG-U133A	201648_at	79	0.860759	0.00115672	0.0287881	1.06417	0.084526	0.76512	2.15 [0.90 - 5.13]
GENE	JAK1	Janus kinase 1	None	MICHIGAN-LC	Lung cancer	Adenocarcinoma	Overall Survival	Michigan (1994-2000)	Beer	HuGeneFL	M64174_at	86	0.151163	0.00640496	0.114848	-1.2474	0.0941381	-0.853023	0.43 [0.16 - 1.16]
GENE	JAK1	Janus kinase 1	None	jacob-00182-MSK	Lung cancer	Adenocarcinoma	Overall Survival	MSK	Shedden	HG-U133A	201648_at	104	0.596154	0.0984248	-	-0.600887	0.270825	-0.643326	0.53 [0.17 - 1.65]
GENE	JAK1	Janus kinase 1	None	GSE13213	Lung cancer	Adenocarcinoma	Overall Survival	Nagoya (1995-1999, 2002-2004)	Tomida	G4112F	A_23_P97005	117	0.581197	0.0562427	-	0.540633	0.417138	0.220705	1.25 [0.73 - 2.13]
GENE	JAK1	Janus kinase 1	None	GSE13213	Lung cancer	Adenocarcinoma	Overall Survival	Nagoya (1995-1999, 2002-2004)	Tomida	G4112F	A_24_P410678	117	0.316239	0.0101786	0.163625	-0.728767	0.0573364	-0.430971	0.65 [0.42 - 1.01]
GENE	JAK1	Janus kinase 1	None	GSE31210	Lung cancer	Adenocarcinoma	Relapse Free Survival	NCCRI	Okayama	HG-U133_Plus_2	201648_at	204	0.892157	0.00394664	0.0784778	0.94116	0.0618155	1.64779	5.20 [0.92 - 29.29]
GENE	JAK1	Janus kinase 1	None	GSE31210	Lung cancer	Adenocarcinoma	Relapse Free Survival	NCCRI	Okayama	HG-U133_Plus_2	1552610_a_at	204	0.897059	0.000689684	0.0186308	1.09482	0.0745357	1.04839	2.85 [0.90 - 9.03]
GENE	JAK1	Janus kinase 1	None	GSE31210	Lung cancer	Adenocarcinoma	Overall Survival	NCCRI	Okayama	HG-U133_Plus_2	1552611_a_at	204	0.897059	0.0209535	0.276881	1.01898	0.0649149	1.17398	3.23 [0.93 - 11.25]
GENE	JAK1	Janus kinase 1	None	GSE31210	Lung cancer	Adenocarcinoma	Overall Survival	NCCRI	Okayama	HG-U133_Plus_2	1562103_at	204	0.107843	0.00256006	0.0554034	-1.17814	0.0263056	-1.12871	0.32 [0.12 - 0.88]
GENE	JAK1	Janus kinase 1	None	GSE31210	Lung cancer	Adenocarcinoma	Relapse Free Survival	NCCRI	Okayama	HG-U133_Plus_2	1552611_a_at	204	0.602941	0.00250071	0.0543578	0.809479	0.0547466	0.880085	2.41 [0.98 - 5.92]
GENE	JAK1	Janus kinase 1	None	GSE31210	Lung cancer	Adenocarcinoma	Relapse Free Survival	NCCRI	Okayama	HG-U133_Plus_2	1562103_at	204	0.328431	0.292379	-	0.325581	0.974075	-0.0134338	0.99 [0.44 - 2.22]
GENE	JAK1	Janus kinase 1	None	GSE31210	Lung cancer	Adenocarcinoma	Overall Survival	NCCRI	Okayama	HG-U133_Plus_2	1552610_a_at	204	0.897059	0.0281266	0.339215	0.966455	0.134267	1.18654	3.28 [0.69 - 15.48]
GENE	JAK1	Janus kinase 1	None	GSE31210	Lung cancer	Adenocarcinoma	Overall Survival	NCCRI	Okayama	HG-U133_Plus_2	201648_at	204	0.416667	0.0108274	0.171386	1.10738	0.0402215	2.56745	13.03 [1.12 - 151.48]
GENE	JAK1	Janus kinase 1	None	jacob-00182-UM	Lung cancer	Adenocarcinoma	Overall Survival	UM	Shedden	HG-U133A	201648_at	178	0.640449	0.0563979	-	0.381676	0.287589	0.436337	1.55 [0.69 - 3.46]
GENE	JAK1	Janus kinase 1	None	GSE11117	Lung cancer	NSCLC	Overall Survival	Basel (2002-2005)	Baty	Novachip human 34.5k	H200004995	41	0.682927	0.00618133	0.111722	-1.55243	0.0346695	-0.775565	0.46 [0.22 - 0.95]
GENE	JAK1	Janus kinase 1	None	GSE3141	Lung cancer	NSCLC	Overall Survival	Duke	Bild	HG-U133_Plus_2	1552610_a_at	111	0.720721	0.00204336	0.046098	0.811506	0.416328	0.196179	1.22 [0.76 - 1.95]
GENE	JAK1	Janus kinase 1	None	GSE3141	Lung cancer	NSCLC	Overall Survival	Duke	Bild	HG-U133_Plus_2	1552611_a_at	111	0.873874	0.11334	-	-0.800489	0.279254	-0.345393	0.71 [0.38 - 1.32]
GENE	JAK1	Janus kinase 1	None	GSE3141	Lung cancer	NSCLC	Overall Survival	Duke	Bild	HG-U133_Plus_2	1562103_at	111	0.891892	0.0109815	0.173207	-1.64487	0.921209	0.035829	1.04 [0.51 - 2.11]
GENE	JAK1	Janus kinase 1	None	GSE3141	Lung cancer	NSCLC	Overall Survival	Duke	Bild	HG-U133_Plus_2	201648_at	111	0.63964	0.087385	-	0.450853	0.594032	0.17992	1.20 [0.62 - 2.32]
GENE	JAK1	Janus kinase 1	None	GSE14814	Lung cancer	NSCLC	Overall Survival	JRB.10	Zhu	HG-U133A	201648_at	90	0.377778	0.080403	-	-0.561914	0.616452	-0.122103	0.89 [0.55 - 1.43]
GENE	JAK1	Janus kinase 1	None	GSE14814	Lung cancer	NSCLC	Disease Specific Survival	JRB.10	Zhu	HG-U133A	201648_at	90	0.555556	0.0369603	0.406484	-0.842791	0.267495	-0.301648	0.74 [0.43 - 1.26]
GENE	JAK1	Janus kinase 1	None	GSE8894	Lung cancer	NSCLC	Relapse Free Survival	Seoul (1995-2005)	Lee	HG-U133_Plus_2	1552610_a_at	138	0.217391	0.142889	-	0.462381	0.643236	0.0488939	1.05 [0.85 - 1.29]
GENE	JAK1	Janus kinase 1	None	GSE8894	Lung cancer	NSCLC	Relapse Free Survival	Seoul (1995-2005)	Lee	HG-U133_Plus_2	1552611_a_at	138	0.173913	0.00167121	0.0390744	1.35967	0.0153103	0.37794	1.46 [1.08 - 1.98]
GENE	JAK1	Janus kinase 1	None	GSE8894	Lung cancer	NSCLC	Relapse Free Survival	Seoul (1995-2005)	Lee	HG-U133_Plus_2	1562103_at	138	0.152174	0.0258455	0.320248	-0.643647	0.523284	-2.13781	0.12 [0.00 - 83.66]
GENE	JAK1	Janus kinase 1	None	GSE8894	Lung cancer	NSCLC	Relapse Free Survival	Seoul (1995-2005)	Lee	HG-U133_Plus_2	201648_at	138	0.615942	0.0113687	0.177744	-0.670875	0.670654	-0.0789572	0.92 [0.64 - 1.33]
GENE	JAK1	Janus kinase 1	None	GSE4573	Lung cancer	Squamous cell carcinoma	Overall Survival	Michigan (1991-2002)	Raponi	HG-U133A	201648_at	129	0.271318	0.132116	-	-0.392563	0.360768	-0.37647	0.69 [0.31 - 1.54]
GENE	JAK1	Janus kinase 1	None	GSE17710	Lung cancer	Squamous cell carcinoma	Relapse Free Survival	UNC	Wilkerson	Agilent-UNC-custom-4X44K	7345	56	0.5	0.0315331	0.366244	-0.758685	0.64815	-0.106998	0.90 [0.57 - 1.42]
GENE	JAK1	Janus kinase 1	None	GSE17710	Lung cancer	Squamous cell carcinoma	Relapse Free Survival	UNC	Wilkerson	Agilent-UNC-custom-4X44K	4608	56	0.785714	0.206457	-	0.491262	0.494405	0.25561	1.29 [0.62 - 2.69]
GENE	JAK1	Janus kinase 1	None	GSE17710	Lung cancer	Squamous cell carcinoma	Overall Survival	UNC	Wilkerson	Agilent-UNC-custom-4X44K	7345	56	0.5	0.0175799	0.244463	-0.886587	0.382488	-0.208637	0.81 [0.51 - 1.30]
GENE	JAK1	Janus kinase 1	None	GSE17710	Lung cancer	Squamous cell carcinoma	Overall Survival	UNC	Wilkerson	Agilent-UNC-custom-4X44K	4608	56	0.589286	0.180366	-	0.481468	0.808934	0.0879123	1.09 [0.54 - 2.23]
GENE	JAK1	Janus kinase 1	None	GSE9891	Ovarian cancer		Overall Survival	AOCS, RBH, WH, NKI-AVL (1992-2006)	Tothill	HG-U133_Plus_2	201648_at	278	0.870504	0.171737	-	-0.417509	0.436834	0.180077	1.20 [0.76 - 1.89]
GENE	JAK1	Janus kinase 1	None	GSE9891	Ovarian cancer		Overall Survival	AOCS, RBH, WH, NKI-AVL (1992-2006)	Tothill	HG-U133_Plus_2	1552610_a_at	278	0.169065	0.0377746	0.412251	-0.477355	0.874633	-0.0287612	0.97 [0.68 - 1.39]
GENE	JAK1	Janus kinase 1	None	GSE9891	Ovarian cancer		Overall Survival	AOCS, RBH, WH, NKI-AVL (1992-2006)	Tothill	HG-U133_Plus_2	1552611_a_at	278	0.363309	0.253763	-	-0.224003	0.995027	-0.001007	1.00 [0.73 - 1.37]
GENE	JAK1	Janus kinase 1	None	GSE9891	Ovarian cancer		Overall Survival	AOCS, RBH, WH, NKI-AVL (1992-2006)	Tothill	HG-U133_Plus_2	1562103_at	278	0.21223	0.0395818	0.424816	-0.429631	0.616014	-0.171987	0.84 [0.43 - 1.65]
GENE	JAK1	Janus kinase 1	None	DUKE-OC	Ovarian cancer		Overall Survival	Duke	Bild	HG-U133A	201648_at	133	0.87218	0.0457921	0.465721	-0.898457	0.3261	-0.152241	0.86 [0.63 - 1.16]
GENE	JAK1	Janus kinase 1	None	GSE8841	Ovarian cancer		Overall Survival	Milan (1992-2003)	Marchini	G4100A	6483	81	0.111111	2.69459e-05	0.0010916	-2.31227	0.00455982	-1.78858	0.17 [0.05 - 0.58]
GENE	JAK1	Janus kinase 1	None	GSE8841	Ovarian cancer		Overall Survival	Milan (1992-2003)	Marchini	G4100A	16983	81	0.851852	0.0704085	-	1.03621	0.449806	0.343135	1.41 [0.58 - 3.43]
GENE	JAK1	Janus kinase 1	None	GSE26712	Ovarian cancer		Disease Free Survival	MSKCC (1990-2003)	Bonome	HG-U133_Plus_2	201648_at	185	0.827027	0.0524821	-	0.399766	0.626555	0.0419028	1.04 [0.88 - 1.23]
GENE	JAK1	Janus kinase 1	None	GSE26712	Ovarian cancer		Overall Survival	MSKCC (1990-2003)	Bonome	HG-U133_Plus_2	201648_at	185	0.859459	0.0980585	-	0.393559	0.94579	-0.00624799	0.99 [0.83 - 1.19]
GENE	JAK1	Janus kinase 1	None	GSE17260	Ovarian cancer		Progression Free Survival	Niigata (1997-2008)	Yoshihara	G4112A	A_23_P97005	110	0.381818	0.188972	-	0.315183	0.915933	0.0275676	1.03 [0.62 - 1.72]
GENE	JAK1	Janus kinase 1	None	GSE17260	Ovarian cancer		Progression Free Survival	Niigata (1997-2008)	Yoshihara	G4112A	A_24_P410678	110	0.827273	0.0210741	0.277999	0.633706	0.403045	0.181869	1.20 [0.78 - 1.84]
GENE	JAK1	Janus kinase 1	None	GSE17260	Ovarian cancer		Overall Survival	Niigata (1997-2008)	Yoshihara	G4112A	A_23_P97005	110	0.136364	0.184374	-	-0.470279	0.818326	-0.0715071	0.93 [0.51 - 1.71]
GENE	JAK1	Janus kinase 1	None	GSE17260	Ovarian cancer		Overall Survival	Niigata (1997-2008)	Yoshihara	G4112A	A_24_P410678	110	0.845455	0.0459534	0.46674	0.683852	0.595928	0.142246	1.15 [0.68 - 1.95]
GENE	JAK1	Janus kinase 1	None	GSE14764	Ovarian cancer		Overall Survival	TOC	Denkert	HG-U133A	201648_at	80	0.175	0.0177005	0.245663	-1.25972	0.544757	-0.297081	0.74 [0.28 - 1.94]
GENE	JAK1	Janus kinase 1	None	GSE16560	Prostate cancer		Overall Survival	Sweden (1977-1999)	Sboner	6K DASL	DAP4_4990	281	0.811388	0.200511	-	0.224341	0.271556	0.161268	1.17 [0.88 - 1.57]
GENE	JAK1	Janus kinase 1	None	E-DKFZ-1	Renal cell carcinoma		Overall Survival	RZPD	Sueltmann	A-RZPD-20	rzpd.de:huber1:Reporter:IMAGE:503892	59	0.644068	0.0406173	0.431875	0.979724	0.178701	0.956299	2.60 [0.65 - 10.49]
GENE	JAK1	Janus kinase 1	None	GSE19234	Skin cancer	Melanoma	Overall Survival	NYU	Bogunovic	HG-U133_Plus_2	1552610_a_at	38	0.842105	0.179798	-	-1.29242	0.605959	-0.208693	0.81 [0.37 - 1.79]
GENE	JAK1	Janus kinase 1	None	GSE19234	Skin cancer	Melanoma	Overall Survival	NYU	Bogunovic	HG-U133_Plus_2	1552611_a_at	38	0.842105	0.136391	-	-1.41502	0.355741	-0.265195	0.77 [0.44 - 1.35]
GENE	JAK1	Janus kinase 1	None	GSE19234	Skin cancer	Melanoma	Overall Survival	NYU	Bogunovic	HG-U133_Plus_2	1562103_at	38	0.473684	0.0216669	0.283455	-1.0876	0.745207	-0.0917154	0.91 [0.52 - 1.59]
GENE	JAK1	Janus kinase 1	None	GSE19234	Skin cancer	Melanoma	Overall Survival	NYU	Bogunovic	HG-U133_Plus_2	201648_at	38	0.710526	0.00521354	0.0978054	-2.32044	0.0696126	-0.876438	0.42 [0.16 - 1.07]
GENE	JAK1	Janus kinase 1	None	GSE30929	Soft tissue cancer	Liposarcoma	Distant Recurrence Free Survival	MSKCC (1993-2008)	Gobble	HG-U133A	201648_at	140	0.492857	0.0207875	0.275337	-0.685041	0.587714	-0.194481	0.82 [0.41 - 1.66]
